# Supplementary material for: Lack of PKCθ Promotes Regenerative Ability of Muscle Stem Cells in Chronic Muscle Injury
Source: PubMed Central journal article supplement (PMC7037041; doi:10.3390/ijms21030932), 2020-01-31
Supplement: ijms-21-00932-s001.pdf [file ijms-21-00932-s001.pdf]

Supplementary Materials:

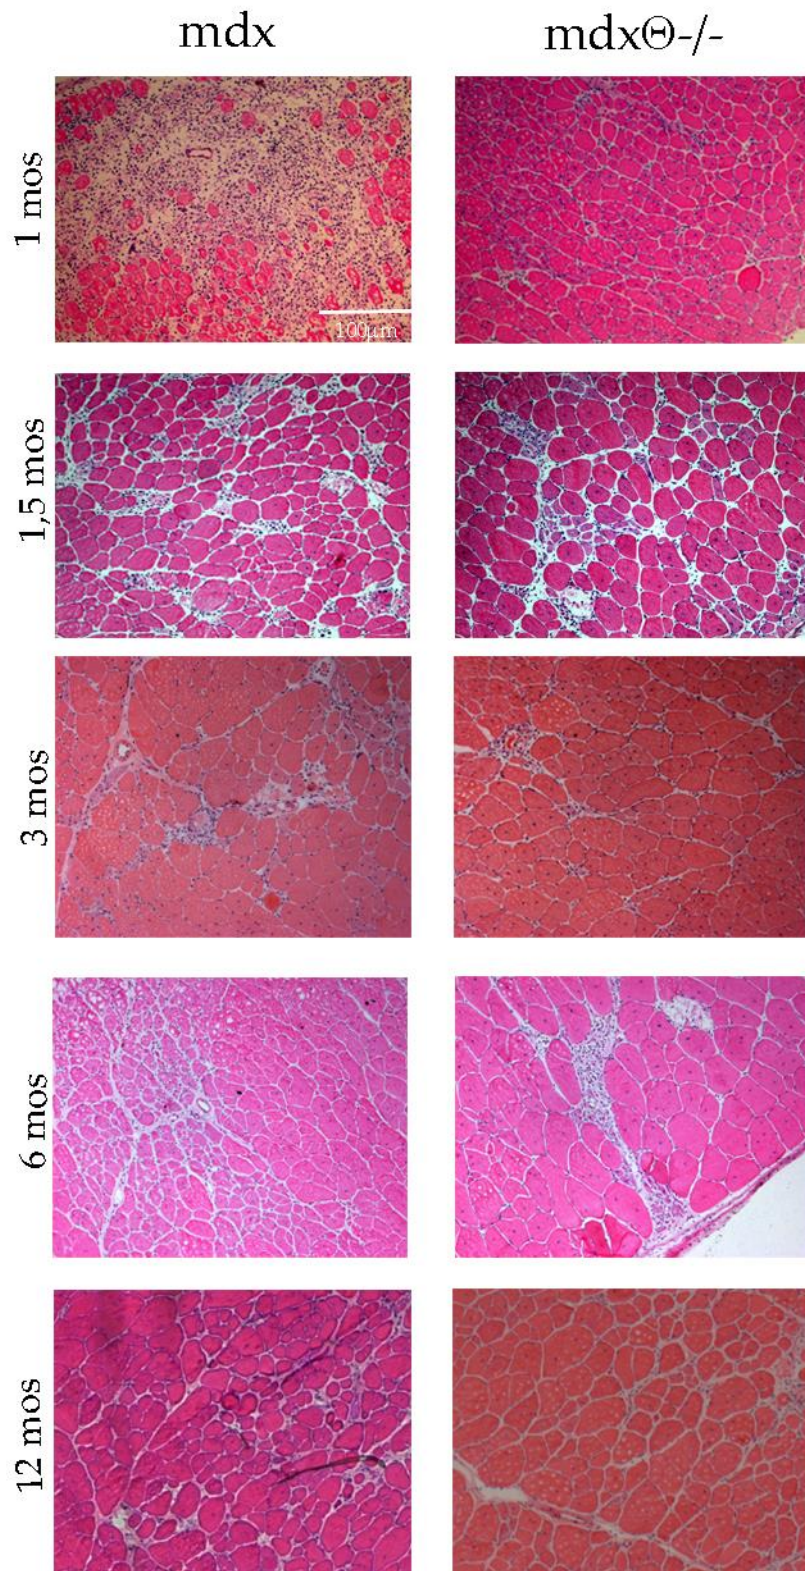

**Supplementary Figure 1.** Representative images of -H&E staining of cryosections derived from mdx and mdx $\ominus$ -/- TA muscle at 1.5, 3, 6 and 12 months (n= 4-5/age/genotype).

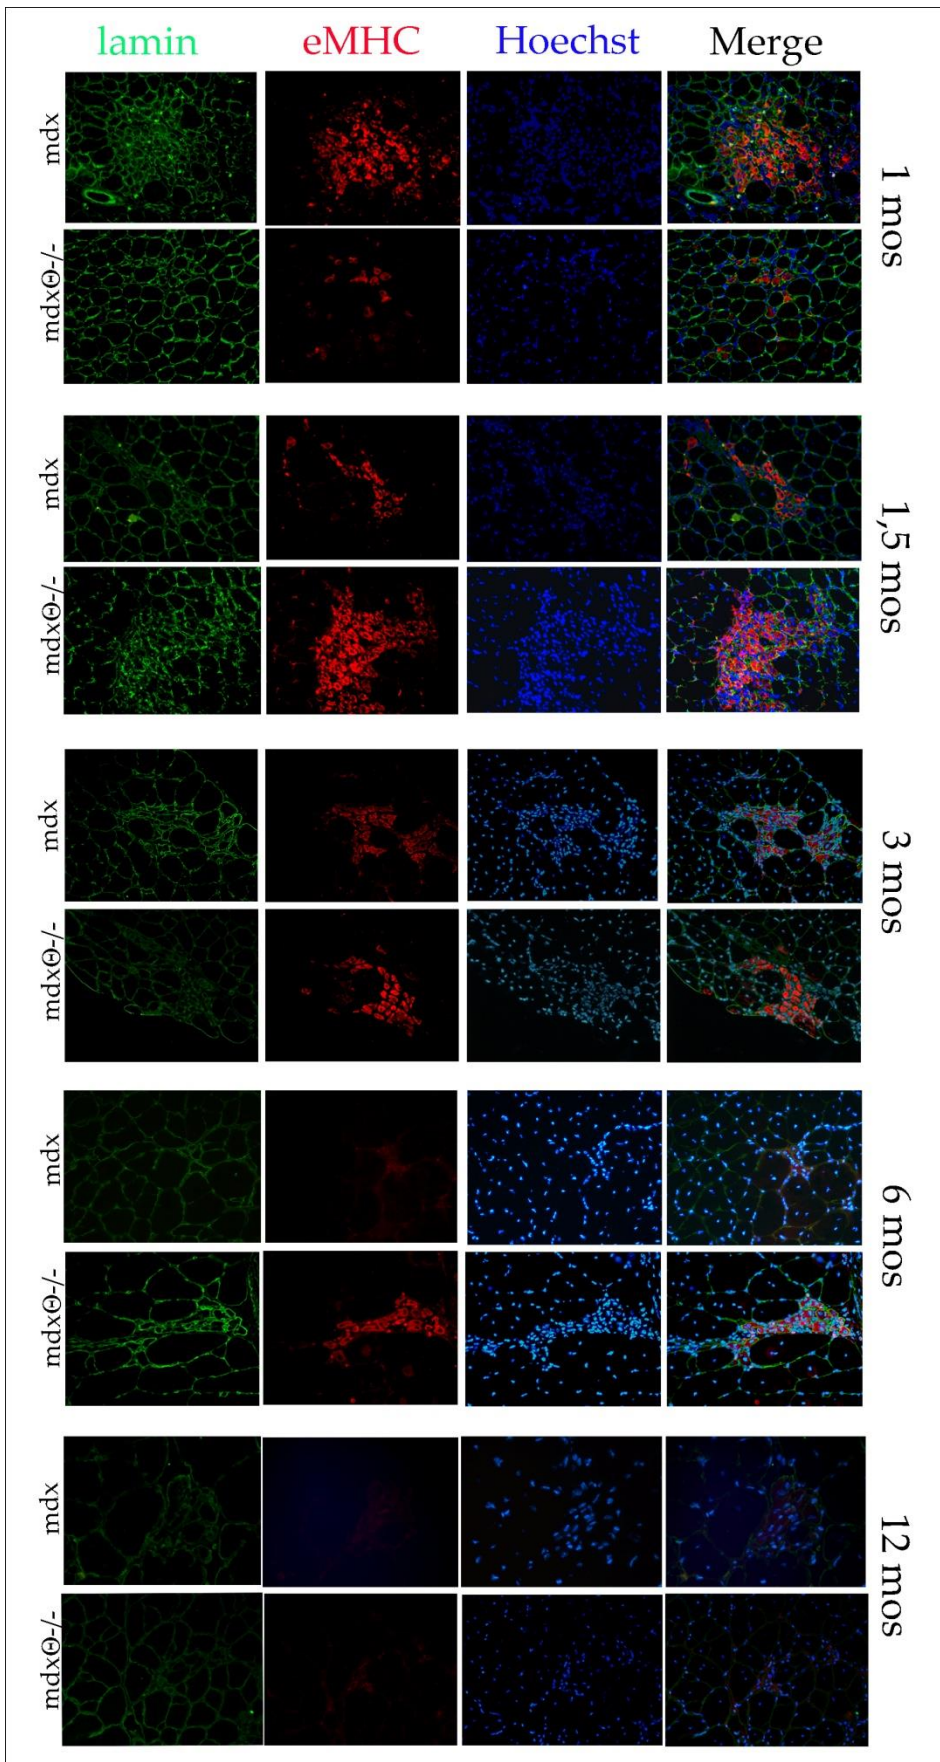

**Supplementary Figure 2.** Representative images of eMHC (red) and Laminin (green) immunofluorescence staining of TA section from 1, 1.5, 3, 6 and 12 months old mdx and mdx $\theta^{-/-}$  mice ( $n=4-5/\text{age/genotype}$ ). Nuclei were counterstained with Hoechst (blue).



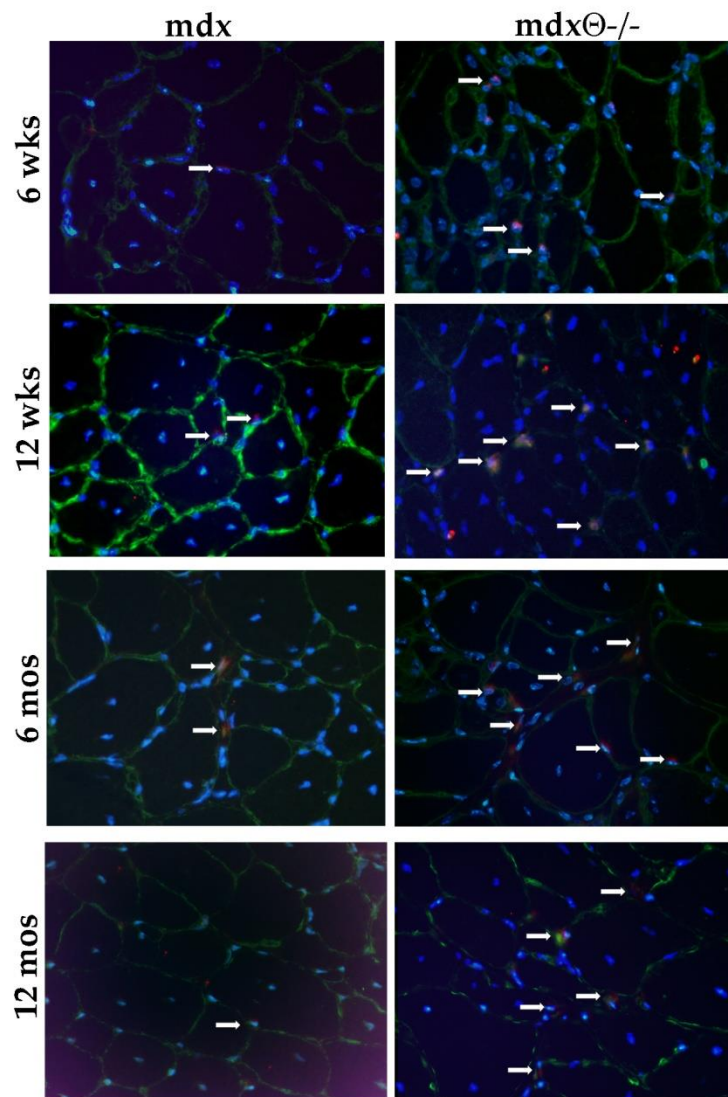

**Supplementary Figure 3.** Representative images of Pax7 (red) and Laminin (green) immunofluorescence analysis of TA section from 6 and 12 weeks, 6 and 12 months old mdx and mdx $\theta$ <sup>-/-</sup> mice (n=3/genotype/age). Nuclei were counterstained with Hoechst (blue).

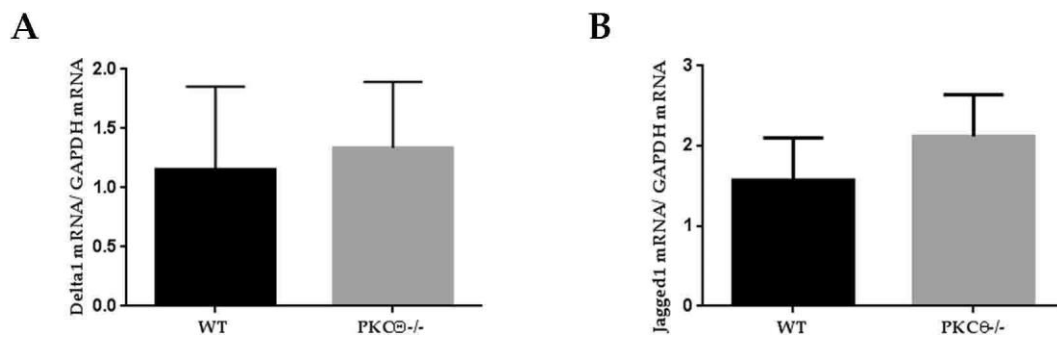

**Supplementary Figure 4.** qRT-analysis of Delta1(A) and Jagged1 (B) expression in healthy WT/bl6 and PKC $\theta$  TA (n=5/genotype) muscle. RNA expression level in WT/bl6 and PKC $\theta$ <sup>-/-</sup> was normalized against GAPDH.

| GENE                  | Primer sequences (5'-3')                                 |
|-----------------------|----------------------------------------------------------|
| Notch1<br>for<br>rev  | GGT CGC AAC TGT GAG AGT GA<br>TTG CTG GCA CAT TCA TTG AT |
| Notch2<br>for<br>rev  | GCA GGA GCA GGA GGT GAT AG<br>GCG TTT CTT GGA CTC TCC AG |
| Notch3<br>for<br>rev  | GTC CAG AGG CCA AGA GAC TG<br>CAG AAG GAG GCC AGC ATA AG |
| Delta1<br>for<br>rev  | CCG GCT GAA GCT ACA GAA AC<br>GAA AGT CCG CCT TCT TGT TG |
| Pax7<br>for<br>rev    | GTCCCAGTCTTACTGCCAC<br>TGTGGACAGGCTCACGTTTT              |
| MyoD<br>for<br>rev    | CGACACCGCCTACTACAGTG<br>GGTGGTGCATCTGCCAAAAG             |
| Numb<br>for<br>rev    | CCGGCATGCTCCAATTG<br>TCTGGCTAAGAGCAGGAAAACC              |
| MyoG<br>for<br>rev    | GCATGGAGTTCGGTCCCAA<br>TATCCTCCACCGTGATGCTG              |
| GAPDH<br>for<br>rev   | ACC CAG AAG ACT GTG GAT GG<br>CAC ATT GGG GGT AGG AAC AC |
| Jagged1<br>for<br>rev | ATCGTGCTGCCTTTCAGTTT<br>GGTCACGCGGATCTGATACT             |

**Supplementary TableS1** Primers used for qPCR
